# Supplementary material
Source: MDPI journal article supplement (https://www.mdpi.com/2673-9976/3/1/2)
Supplement: s1 [file s1]

**IECAG  
2021**

# The 1st International Electronic Conference on Agronomy

03–17 MAY 2021 | ONLINE

Chaired by **PROF. DR. YOUSSEF ROUPHAEL**

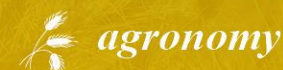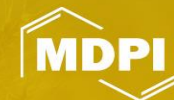

## A case study about the use of precision agriculture technology applied to a Zn biofortification workflow for grapevine *Vitis Vinifera* cv Moscatel

Diana Daccak <sup>1,2,\*</sup>, Inês C. Luís <sup>1,2</sup>, Ana C. Marques <sup>1,2</sup>, Ana Rita F. Coelho <sup>1,2</sup>, Cláudia Campos Pessoa <sup>1,2</sup>, Maria Manuela Silva <sup>2,3</sup>,  
Manuela Simões <sup>1,2</sup>, Fernando Reboredo <sup>1,2</sup>, Maria Fernanda Pessoa <sup>1,2</sup>, Paulo Legoinha <sup>1,2</sup>, Maria Graça Brito <sup>1,2</sup>, José Carlos  
Kullberg <sup>1,2</sup>, José António Almeida <sup>1,2</sup>, Paula Scotti Campos <sup>2,4</sup>, José C. Ramalho <sup>2,5</sup>, João Caleiro <sup>1,2</sup> and Fernando C. Lidon <sup>1,2</sup>

<sup>1</sup> Earth Sciences Department, Faculdade de Ciências e Tecnologia, Universidade Nova de Lisboa, Caparica, Portugal;

<sup>2</sup> GeoBioTec Research Center, Faculdade de Ciências e Tecnologia, Universidade Nova de Lisboa, Caparica, Portugal;

<sup>3</sup> ESEAG / Grupo Universidade Lusófona, Lisboa, Portugal;

<sup>4</sup> INIAV, Instituto Nacional de Investigação Agrária e Veterinária, Oeiras, Portugal

<sup>5</sup> PlantStress & Biodiversity Lab, Centro de Estudos Florestais, Instituto Superior Agronomia, Universidade de Lisboa, Oeiras, Portugal;

\* Correspondence: [d.daccak@campus.fct.unl.pt](mailto:d.daccak@campus.fct.unl.pt)

**Abstract:** As human population is growing worldwide, the food demand is sharply increasing. Following this assumption, strategies to enhance the food production are being explored, namely smart farming, for monitoring crops during the production cycle. In this study, a vineyard of *Vitis Vinifera* cv. Moscatel located in Palmela (N 38° 35' 47.113'' O 8° 40' 46.651) was submitted to a Zn biofortification workflow, through foliar application of zinc oxide (ZnO) or zinc sulfate (ZnSO<sub>4</sub>) (respectively, at a concentration of 60% and 90% - 900g.ha<sup>-1</sup> and 1350g.ha<sup>-1</sup>). The field morphology and vigor of the vineyard was performed through Unmanned Aerial Vehicles (UAV's) images (assessed with altimetric measurement sensors), synchronized by GPS. Drainage capacity and slopes showed 1/3 of the field with reduced surface drainage and a maximum variation of 0.80 m between the extremes (almost flat) respectively. The NDVI (Normalized Difference Vegetation Index) values reflected a greater vigor in treated grapes with treatment SZn90 showing a higher value. These data were interpolated with mineral content, monitored with atomic absorption analysis (showing a 1.3 fold increase for the biofortification index). It was concluded that the used technologies furnishes specific target information in real time about the crops production.

**Keywords** Grapes; NDVI; Precision Agriculture; UAV's; *Vitis Vinifera*; Zn Biofortification.

**IECAG**  
**2021**

# Materials and Methods

Experimental  
Field

Foliar application with  $\text{ZnSO}_4$  and  $\text{ZnO}$   
(0%, 60% and 90% - 0, 900 and 1350 g ha<sup>-1</sup>)

Field  
Morphology  
and vigor

UAV's images

Quantification  
of Zn

Atomic absorption spectrophotometer

# Results and Discussion

| Slope classes (%) | Surface Drainage | Area (m <sup>2</sup> ) | % Area | Moscatel variety | Zn (ppm) |        | NDVI      |      |      |
|-------------------|------------------|------------------------|--------|------------------|----------|--------|-----------|------|------|
|                   |                  |                        |        |                  | Mean     | SE     | Treatment | Mean | SE   |
| [0 – 5 %]         | Reduced          | 589.9                  | 34.87  | Control          | 6.04a    | ± 0.67 | Control   | 0.58 | 0.18 |
| [5 – 20]          | Moderate         | 1080.5                 | 63.86  | OZn60            | 6.44a    | ± 0.50 | OZn60     | 0.61 | 0.16 |
| > 20 %            | Elevated         | 21.4                   | 1.27   | OZn90            | 7.91a    | ± 0.28 | OZn90     | 0.61 | 0.18 |
|                   |                  |                        |        | SZn60            | 6.58a    | ± 0.65 | SZn60     | 0.64 | 0.15 |
|                   |                  |                        |        | SZn90            | 7.49a    | ± 0.75 | SZn90     | 0.64 | 0.14 |
| <b>Total</b>      |                  | 1691.8                 | 100    |                  |          |        |           |      |      |

- The slopes of the experimental field were determined, being found a moderate surface drainage prevailing, with 63.86% of infiltration capacity.
- Zn contents in treated grapes showed, relatively to the control, 1.2 - 1.3 fold increases in the higher concentrations of treatments, OZn90 and SZn90 respectively.
- After the 4th treatment, Moscatel treated grapes revealed a positive response, showing higher NDVI values than the control, with treatments SZn displaying highest foliage densities.

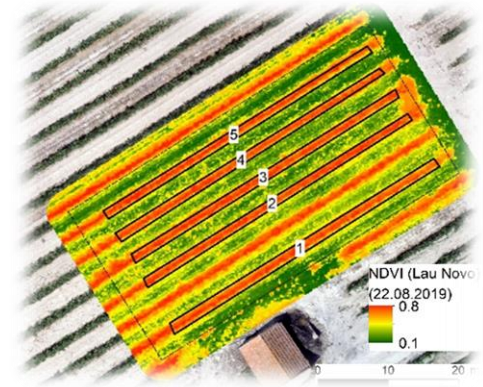

# Conclusions

- Through images obtained with cameras attached to UAV's, it's possible to get information about morphology of the field and potential limiting conditions for vines development.
- Using the Moscatel field as a test system, important characteristics, namely moderate infiltration capacity and the use of irrigation, enabling vines to have more resistance to hydric stress were optimized.
- The obtained images further gave information about the crops state, being detected a positive response to Zn fertilization with an increase in the Zn contents and vigor of vines subjected to ZnO and ZnSO<sub>4</sub>.

# Acknowledgments

The authors thanks to Engenier Luís Silva (Adega Cooperativa de Palmela-Casa Agrícola Nunes Oliveira da Silva Lda) for technical assistance. We also thanks to the Research centres (GeoBioTec) UIDB/04035/2020 and (CEF) UIDB/00239/2020 for support facilities.

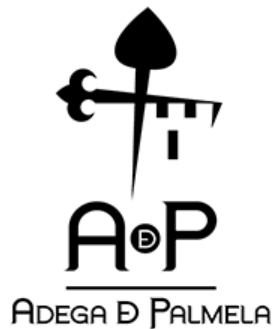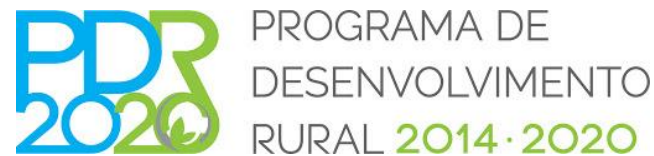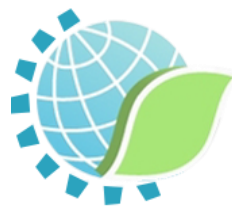

**geobiotec**  
Geobiociências, Geoengenharias  
e Geotecnologias

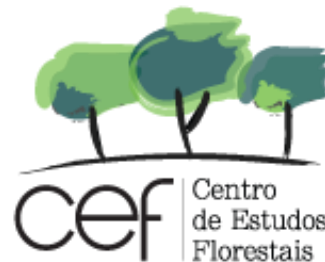

**IECAG**  
**2021**
